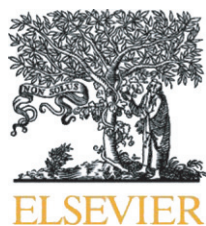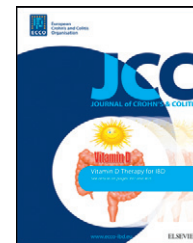

# Corticosteroids and immunosuppressive therapy influence the result of QuantiFERON TB Gold testing in inflammatory bowel disease patients

Ulf Helwig<sup>a,\*</sup>, Michael Müller<sup>b,1</sup>, Jürgen Hedderich<sup>c,2</sup>, Stefan Schreiber<sup>d,3</sup>

<sup>a</sup> Medical Practice for Internal Medicine Oldenburg/University of Kiel. Neue Donnerschweer. Str. 30, 26123 Oldenburg, Germany

<sup>b</sup> Medical Laboratory Oldenburg, Oldenburg, Germany, Koppelstr. 7, 26135 Oldenburg, Germany

<sup>c</sup> Institute for Medical Statistic of the University of Kiel, Kiel, Brunswiker Str. 10, 24105 Kiel, Germany

<sup>d</sup> First Medical Department, University Hospital Schleswig-Holstein, Campus Kiel, Arnold-Heller-Str., 25105 Kiel, Germany

Received 26 June 2011; received in revised form 25 September 2011; accepted 26 September 2011

## KEYWORDS

Inflammatory Bowel Disease;  
IBD;  
TBC-screening;  
QuantiFERON;  
Medical treatment and safety

## Abstract

**Introduction:** Latent tuberculosis infection is detected by the tuberculin skin test before treating with anti-Tumour-Necrosis factor alpha (anti TNF $\alpha$ ) reagents. More accurate are Interferon gamma release assays (IFN $\gamma$  release assays) to identify patients with latent tuberculosis. Because of a positive control in this assay, it is possible to identify those patients in which a result of tuberculosis testing is not available due to a lack of stimulation capacity of lymphocytes (indeterminate result). Patients suffering from IBD are often treated with immunosuppressive agents, which may influence the results of tuberculosis testing.

**Aim:** The aim is to investigate the influence of immunosuppressive agents on the outcome of IFN $\gamma$ -release assay.

**Methods:** 50 consecutive patients were documented before introducing anti-TNF-treatment in this single centre study between April 2009 and April 2010. Data of IFN $\gamma$  release assay for latent tuberculosis, skin test and laboratory data and current medication were enrolled.

**Results:** For the period of one year data of 45 consecutive patients was available for statistical analysis. 24 patients out of 45 (corresponding to 53.3%) received at least low doses of corticoid treatment and 27 patients out of 45 (corresponding to 60.0%) received immunosuppressive agents. 13 patients out of 45 (corresponding to 28.9%) had an indeterminate result of the

\* Corresponding author. Tel.: +49 441 31433; fax: +49 441 382744.

E-mail addresses: [helwig@internisten-ol.de](mailto:helwig@internisten-ol.de) (U. Helwig), [m.mueller@medlab-oldenburg.de](mailto:m.mueller@medlab-oldenburg.de) (M. Müller), [hedderich@medinfo.uni-kiel.de](mailto:hedderich@medinfo.uni-kiel.de) (J. Hedderich), [s.schreiber@mucosa.de](mailto:s.schreiber@mucosa.de) (S. Schreiber).

<sup>1</sup> Tel.: +49 441 36140802; fax: +49 441 36140832.

<sup>2</sup> Tel.: +49 431 597 3182; fax: +49 431 597 3193.

<sup>3</sup> Tel.: +49 431 597 2350; fax: +49 431 597 1302.

QuantiFERON test. A correlation between the indeterminate result and combination therapy of corticosteroids was found. The concomitant therapy of immunosuppressive agents lead to a lower IFN release but no significance was found.

**Conclusions:** Steroid treatment and further combination therapy with immunosuppressive agents lead to a high risk of indeterminate QuantiFERON test.

© 2011 European Crohn's and Colitis Organisation. Published by Elsevier B.V. All rights reserved.

## 1. Introduction

Tumournecrosisfactoralpha (TNF $\alpha$ ) is a key cytokine in the inflammatory cascade in Crohn's disease and also in ulcerative colitis. Therefore, the therapeutic blockage of TNF $\alpha$  is an option for both diseases.<sup>1,2</sup>

Additionally, TNF $\alpha$  is also a key cytokine in protective host defence against *Mycobacterium tuberculosis* (*M. tuberculosis*) and plays a major role in the development and maintenance of the granuloma which compartmentalizes the tubercle bacilli. The therapeutic inhibition of TNF $\alpha$  via antibodies is associated with a 4 to 5 fold increased incidence of tuberculosis in patients latently infected with *M. tuberculosis*.<sup>3–5</sup> Therefore, it is recommended to exclude a latent tuberculosis infection prior to starting a TNF-alpha-inhibitor treatment. A common recommendation to exclude tuberculosis infection is to perform a chest radiography, which might exclude granulomas over the size of 1 cm, a detailed travel history and TB exposures as well as to measure the skin reaction of purified protein derivatives of *M. tuberculosis* (PPD).<sup>1,6,7</sup>

The PPD test is a delayed-type-hypersensitivity reaction test towards a mixture of more than 200 different *M. tuberculosis* proteins. These antigens were also found in other mycobacteria and this is the reason for poor specificity in patients vaccinated with bacille Calmette-Guérin (BCG).<sup>8</sup> Furthermore, the reactions depend on a sufficient immune system, which is compromised in case of use of therapeutic immunosuppressive agents.<sup>9</sup>

An alternative diagnostic approach is to test the interferon gamma release as a specific reaction of T-cells on stimulation with *M. tuberculosis*.<sup>10</sup> At the moment, there are two assays available to test ex vivo the IFN $\gamma$  release on peripheral mononuclear cells (ELISpot) or in whole blood stimulation (QuantiFERON).<sup>11</sup> The purpose of these testing systems is a higher specificity because of absent or false positive reaction against other mycobacteria and BCG vaccination. Furthermore, it has a higher sensitivity and the possibility to detect an indeterminate result via a positive reaction control.<sup>11,12</sup>

The therapeutic strategy in Crohn's disease and ulcerative colitis is the use of corticosteroids in the acute phase of inflammation and immunosuppressive agents like azathioprine and 6-mercaptopurine or methotrexate for maintenance of the remission phase.<sup>1</sup> In case of treatment failure or fulminant inflammation, the therapeutic options are anti-TNF $\alpha$  antibodies (Infliximab, Adalimumab or Certolizumab).<sup>1,6,7,13</sup> Hence, patients are often under immunosuppressive therapy before starting an anti-TNF $\alpha$ -therapy.

The immunosuppressive therapy may influence also the test of latent tuberculosis.

In the performance of the tuberculin skin test a positive control is not implicated, whereas a false indeterminate result cannot be detected.

Recently, several studies have documented the benefit of IFN $\gamma$  release assay in a large number of patients in comparison to the tuberculin skin test.<sup>12,14–18</sup> In these cohorts combination of immunosuppressive therapy and corticosteroid treatment is rare and indeterminate results are not often. The usage of immunosuppressive agents and corticosteroids prior to anti-TNF $\alpha$ -therapy is a standard procedure in Germany.

Therefore, we investigated a consecutive prospective study in patients suffering from Crohn's disease and ulcerative colitis with indication of anti-TNF $\alpha$ -use. We assessed the rate of indeterminate results of QuantiFERON test and its association with corticosteroid and immunosuppressive treatment.

## 2. Patients and methods

50 consecutive patients with indication for an anti-TNF-therapy were documented in this single centre study. 45 patients fulfilled all documentation criteria. Other patients had an IFN $\gamma$ -releasing test performed in another laboratory without available data on mitogen and antigen stimulation. Consequently, we excluded these patients from all statistical analysis.

### 2.1. Ethics statement

This study was approved by the ethical committee of Lower Saxony, Hanover, Germany and was performed in concordance to Helsinki declaration.

### 2.2. QuantiFERON test

Laboratory parameters including liver enzymes, CRP, white blood cell count, haemoglobin, thrombocytes etc. were performed prior to the start of anti-TNF-treatment. During this blood collection, venous blood was obtained for the QuantiFERON assay. The QuantiFERON assay (Cellestis, Victoria, Australia) was performed according to the manufacturer's instruction.

In short: one ml of whole venous blood was added to each of the three assay kit-tubes (nil, mitogen, antigen). The tubes were transferred via courier to the performing laboratory for assay. After incubation for 24 h at 37 °C, samples were centrifuged and supernatant was taken to perform the IFN $\gamma$ -ELISA.

Indeterminate results were defined as increase less than 0.5 IU/ml after mitogen stimulation. A positive test was defined as increase of IFN $\gamma$  to over 0.35 IU/ml after tuberculosis antigen stimulation.

### 2.3. Statistic analysis

The primary point was to determine the influence of indeterminate results of the QuantiFERON test by immunosuppressive agents. Results from 45 patients were analysed using SPSS Software (version 18.0). Based on Kolmogorov–Smirnov tests normal distribution could not be assumed. Therefore we used median and quartile values (box-whisker plots) for data description. Differences between some subpopulations were tested with the Mann–Whitney *U*-Test with a significance level set at 5%. The probability for a valuable test was predicted by a logistic regression model. For the logistic regression we included corticoid therapy immunosuppression, blood cell count of erythrocytes, leucocytes, thrombocytes, C-reactive protein, iron serum level, sex and the diagnosis of Crohn's disease or ulcerative colitis.

The dose depending curve (Fig. 1) is based on the results of the logistic regression where corticosteroids and immunosuppression are the main factors.

### 3. Results

45 patients fulfilled all criteria to enter the statistical analysis. 19 male and 26 female were included; 34 patients suffered from Crohn's disease and 11 patients from ulcerative colitis. 27 patients out of 45 (corresponding to 60.0%) received immunosuppressive therapy. 24 patients out of 45 (corresponding to 53.3%) received at least a low doses of corticosteroid treatments and 21 patients out of

**Table 1** Characteristics of patients.

| Characteristics of patients                           |                           | 45 |
|-------------------------------------------------------|---------------------------|----|
|                                                       | Crohn's disease           | 34 |
|                                                       | Ulcerative colitis        | 11 |
| Sex                                                   |                           |    |
|                                                       | Male                      | 19 |
|                                                       | Female                    | 26 |
| QuantiFERON results                                   |                           |    |
|                                                       | Positive for tuberculosis | 1  |
|                                                       | Negative for tuberculosis | 31 |
|                                                       | Indeterminate result      | 13 |
| Corticosteroid treatment                              |                           |    |
|                                                       | Yes                       | 24 |
|                                                       | No                        | 21 |
|                                                       | 15 mg or more/day         | 18 |
| Immunosuppressive therapy                             |                           |    |
|                                                       | Yes                       | 27 |
|                                                       | No                        | 18 |
| Combined immunosuppressive and corticosteroid therapy |                           | 15 |

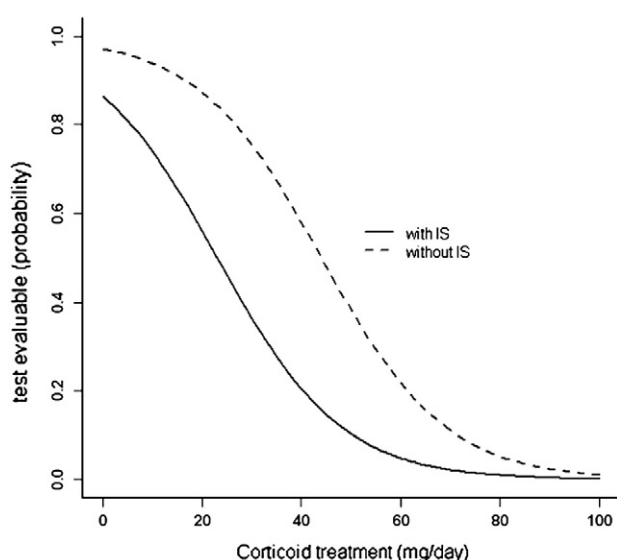

**Figure 1** Dose depending curve of risk for indeterminate results of the IFN $\gamma$ -release test. Data bases on the logistic regression model. Odds ratio is 5.3 (confidence interval is 0.68–42.50).

45 (corresponding to 47%) patients were free of corticosteroid treatment. Further patient data is presented in Table 1.

One patient out of 45 (corresponding to 2.2%) was tested positively, 31 patients out of 45 (corresponding to 68%) were tested negatively and 13 patients out of 45 representing 28.9% showed an indeterminate result of the QuantiFERON test. The logistic regression model has shown corticoid treatment as being the main independent risk factor to achieving indeterminate results ( $p=0.002$ ).

To describe the difference between the patient group receiving corticosteroid, corticosteroids and immunosuppression in combination or no concomitant medication we used the Mann–Whitney *U*-test. The indeterminate results were associated with corticosteroid treatment and stronger association was found in patients with combined immunosuppressive therapy and corticosteroid treatment. These findings depend upon the dose. A daily dose of 15 mg or more showed a high risk for indeterminate results.

We analysed the stimulation capacity in dependence of immunosuppressive therapy.

Patients with immunosuppressive therapy and corticoid treatment over 15 mg/day had a significant lower stimulation capacity for IFN $\gamma$ -release after mitogen stimulation than patients under immunosuppressive therapy and less than 15 mg corticoids per day (Fig. 2). Also, without immunosuppressive therapy, the IFN $\gamma$ -release was reduced under corticoid treatment.

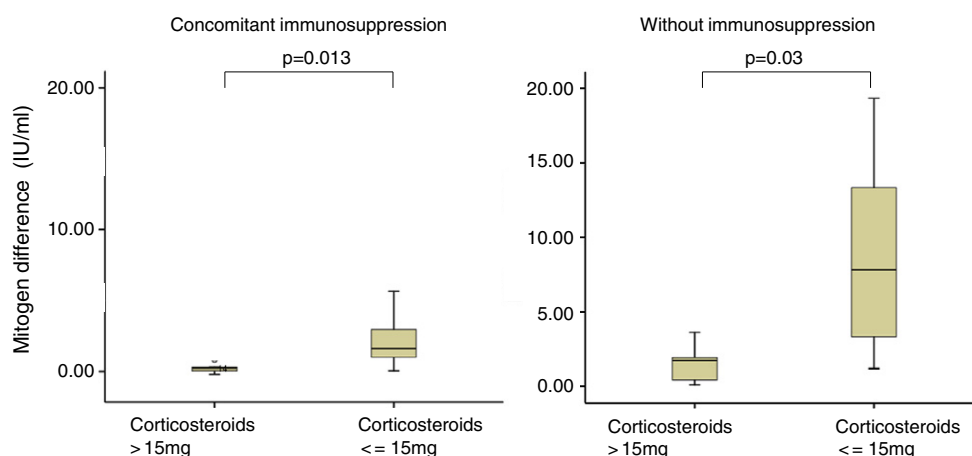

**Figure 2** Stimulation capacity of whole blood stimulation. Results are shown as difference between basal IFN $\gamma$  release and after stimulation with mitogen. Data are differentiated for immunosuppressive agents and co-medication of more than 15 mg or less than 15 mg corticosteroids (prednisolone equivalent) per day. Data are shown as median and interquartile ranges.

#### 4. Discussion

The presented study shows the effect of anti-inflammatory agents on the outcome of testing the latent tuberculosis infection. Corticosteroid treatment increases the risk for indeterminate results. Moreover, the combination of immunosuppressive medication with corticosteroids further increases the risk for an indeterminate result of the QuantiFERON test. Until now it is unclear, if this is due to the general immunologic situation of patients suffering from Crohn's disease or ulcerative colitis or not. In the past the suspicion of modified immunologic reactions against tuberculosis agents in inflammatory bowel disease was discussed (Fig. 3).<sup>19–21</sup>

The therapeutic strategy against Crohn's disease and ulcerative colitis is the use of corticosteroids in the acute phase of inflammation and immunosuppressive agents like azathioprine and 6-mercaptopurine or methotrexate for maintenance of remission phase. In patients with fistula disease and severe inflammation or failure to corticoid and/or immunosuppressive therapy the treatment with anti-TNF-

antibodies like Infliximab, Adalimumab or Certolizumab will be induced.

This therapeutic strategy reflects the high rate of patients with immunomodulatory treatment in the presented cohort (63%).

In the presented patient group, 28.9% had an indeterminate result of the IFN $\gamma$ -release assay. However, in the presented patient population there was only one patient tested positively for latent tuberculosis infection. We cannot comment on the risk for undiagnosed latent tuberculosis reaction because of the low number of patients with latent tuberculosis.

We performed risk factors for the development of an indeterminate result and found that the corticosteroid therapy is the main risk factor for false negative results. The risk increases with higher doses of corticosteroids and is supported by immunosuppressive agents. In the combination therapy with immunosuppressive agent corticoid, doses of 15 mg/day or more often lead to indeterminate results. This is related to the reduced stimulation capacity of lymphocytes when patients receive corticoid treatment and is

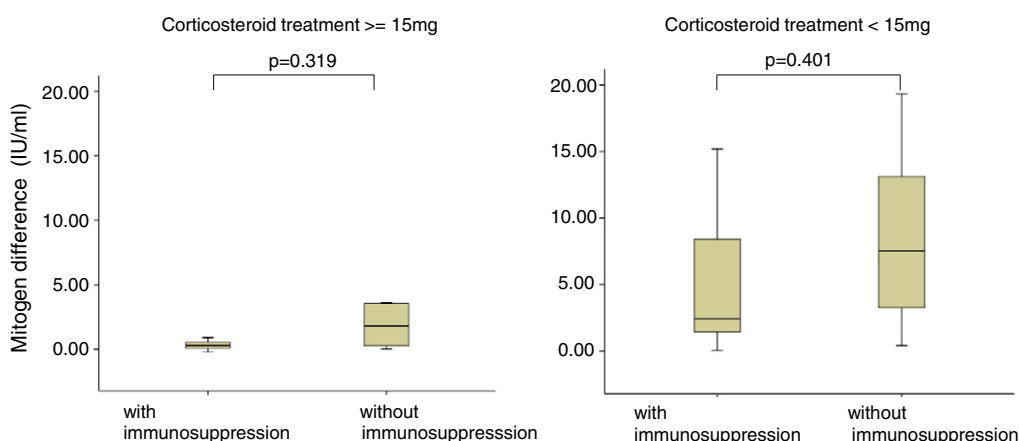

**Figure 3** Stimulation capacity of whole blood stimulation. Results are shown as difference between basal IFN $\gamma$  release and after stimulation with mitogen. Data are differentiated for ≥15 mg corticosteroids (left side) and less than 15 mg corticosteroids (right side) (prednisolone equivalent per day). Differences are shown between co-medication with immunosuppressive agents. Data are shown as median and interquartile range.



further reduced in case of concomitant therapy with immunosuppressive agents.

The stimulation capacity is significantly higher in patients under immunosuppressive therapy when the daily corticoid dose is less than 15 mg prednisolone equivalent.

However, the presented study population might show a low rate of latent tuberculosis infections compared to other studies,<sup>14,15,22</sup> but, nonetheless, our data represents the low incidence of tuberculosis infection in the northwest of Germany.<sup>23</sup> Hence, this data is comparable to i.e. the North American population where 1.5% positive QuantiFERON tests were found.<sup>24</sup>

In the presented study a high rate of an indeterminate results occurred compared to the studies of Schoepfer et al. and Qumseya et al. with a maximum of 10% of indeterminate results.<sup>18,24</sup> One explanation for this difference is the higher rate of treatment with immunosuppressive agents in combination with a high dose of corticosteroids prior to starting anti-TNF-therapy in the presented population. This might be due to the German recommendation of use of anti-TNF-therapy in patients with refractory disease to immunosuppressive agents or corticosteroids.<sup>6,7</sup>

A couple of months ago Papay et al. published predictors of indeterminate results of IFN $\gamma$  release assay whereas in one cohort the indeterminate results were 13.7% and in an IBD-cohort only 7.7%.<sup>17,25</sup> In the IBD-cohort a total of 71.6% were under immunosuppressive therapy; 47.1% under thiopurines and MTX, 33.7% under steroids and 8.7% under TNF- $\alpha$  inhibitors. However, in the IBD-cohort no data on the combined therapy with immunosuppressive agents and corticosteroids was available whereas in the second cohort data on corticosteroids is available and leads to similar results as the main risk factor for indeterminate results of the IFN-gamma release assay. Moreover we could show in the presented study an influence depending on the dose of corticosteroids on the results of QuantiFERON-test.

In conclusion, we can confirm the data of Papay et al. that corticosteroid treatment is the main risk factor for an indeterminate result of IFN- $\gamma$  release assay. Moreover, we found a high correlation between the combination of immunosuppressive agents and corticosteroids in the presented study. Furthermore, we could show an influence depending on the dose of corticosteroids on the indeterminate results of IFN $\gamma$  release assay. Therefore, we recommend reducing the corticosteroid treatment to less than 15 mg prednisolone per day if corticosteroid treatment is combined with immunosuppressive agents before starting the QuantiFERON-test. If the clinical situation of the patient requires a high dose of corticosteroid treatment and does not allow a dose reduction of corticosteroids, we recommend excluding latent tuberculosis infection by chest-x-ray and detailed medical history.

The study-setup and the low patient number do not allow a comment on the risk for false negative results and no comparison to the tuberculin skin test.

## References

1. Travis SP, Stange EF, Lemann M, Oresland T, Chowers Y, Forbes A, et al. European evidence based consensus on the diagnosis and management of Crohn's disease: current management. *Gut* 2006;**55**(Suppl 1):i16–35.
2. Lin J, Ziring D, Desai S, Kim S, Wong M, Korin Y, et al. TNF $\alpha$  blockade in human diseases: an overview of efficacy and safety. *Clin Immunol* 2008;**126**:13–30.
3. Desai SB, Furst DE. Problems encountered during anti-tumour necrosis factor therapy. *Best Pract Res Clin Rheumatol* 2006;**20**:757–90.
4. Keane J, Gershon S, Wise RP, Mirabile-Levens E, Kasznica J, Schwieterman WD, et al. Tuberculosis associated with infliximab, a tumor necrosis factor  $\alpha$ -neutralizing agent. *N Engl J Med* 2001;**345**:1098–104.
5. Malipiedi AS, Rajendran R, Kallarackal G. Disseminated tuberculosis after anti-TNF $\alpha$  treatment. *Lancet* 2007;**369**:162.
6. Hoffmann JC, Preiss JC, Autschbach F, Buhr HJ, Hauser W, Herrlinger K, et al. Clinical practice guideline on diagnosis and treatment of Crohn's disease. *Z Gastroenterol* 2008;**46**:1094–146.
7. Hoffmann JC, Zeitz M, Bischoff SC, Brambs HJ, Bruch HP, Buhr HJ, et al. Diagnosis and therapy of ulcerative colitis: results of an evidence based consensus conference by the German society of Digestive and Metabolic Diseases and the competence network on inflammatory bowel disease. *Z Gastroenterol* 2004;**42**:979–83.
8. Tissot F, Zanetti G, Francioli P, Zellweger JP, Zysset F. Influence of bacille Calmette-Guerin vaccination on size of tuberculin skin test reaction: to what size? *Clin Infect Dis* 2005;**40**:211–7.
9. Mow WS, Abreu-Martin MT, Papadakis KA, Pitchon HE, Targan SR, Vasiliauskas EA. High incidence of anergy in inflammatory bowel disease patients limits the usefulness of PPD screening before infliximab therapy. *Clin Gastroenterol Hepatol* 2004;**2**:309–13.
10. Dyrhol-Riise AM, Gran G, Wenzel-Larsen T, Blomberg B, Haan-shuus CG, Morkve O. Diagnosis and follow-up of treatment of latent tuberculosis; the utility of the QuantiFERON-TB Gold In-tube assay in outpatients from a tuberculosis low-endemic country. *BMC Infect Dis*;10:57.
11. Bocchino M, Matarese A, Bellofiore B, Giacomelli P, Santoro G, Balato N, et al. Performance of two commercial blood IFN-gamma release assays for the detection of *Mycobacterium tuberculosis* infection in patient candidates for anti-TNF- $\alpha$  treatment. *Eur J Clin Microbiol Infect Dis* 2008;**27**:907–13.
12. Dyrhol-Riise AM, Gran G, Wenzel-Larsen T, Blomberg B, Haan-shuus CG, Morkve O. Diagnosis and follow-up of treatment of latent tuberculosis; the utility of the QuantiFERON-TB Gold In-tube assay in outpatients from a tuberculosis low-endemic country. *BMC Infect Dis* 2010;**10**:57.
13. Carter MJ, Lobo AJ, Travis SP. Guidelines for the management of inflammatory bowel disease in adults. *Gut* 2004;**53**(Suppl 5):V1–V16.
14. Gogus F, Gunendi Z, Karakus R, Erdogan Z, Hizel K, Atalay F. Comparison of tuberculin skin test and QuantiFERON-TB gold in tube test in patients with chronic inflammatory diseases living in a tuberculosis endemic population. *Clin Exp Med* 2010;**10**:173–5.
15. Inanc N, Aydin SZ, Karakurt S, Atagunduz P, Yavuz S, Direskeneli H. Agreement between Quantiferon-TB gold test and tuberculin skin test in the identification of latent tuberculosis infection in patients with rheumatoid arthritis and ankylosing spondylitis. *J Rheumatol* 2009;**36**:2675–81.
16. Kaushik VV, Ambalavanan S, Binyamin K. Comment on: Use of the QuantiFERON TB Gold test as part of a screening programme in patients with RA under consideration for treatment with anti-TNF- $\alpha$  agents: the Newcastle (UK) experience. *Rheumatology (Oxford)* 2007;**46**:1863–4 author reply 1864–5.
17. Papay P, Eser A, Winkler S, Frantal S, Primas C, Miehsler W, et al. Factors impacting the results of interferon-gamma release assay and tuberculin skin test in routine screening for latent tuberculosis in patients with inflammatory bowel diseases. *Inflamm Bowel Dis* 2011;**17**:84–90.

18. Schoepfer AM, Flogerzi B, Fallegger S, Schaffer T, Mueller S, Nicod L, et al. Comparison of interferon-gamma release assay versus tuberculin skin test for tuberculosis screening in inflammatory bowel disease. *Am J Gastroenterol* 2008;**103**: 2799–806.
19. Seldenrijk CA, Drexhage HA, Meuwissen SG, Meijer CJ. T-cellular immune reactions (in macrophage inhibition factor assay) against *Mycobacterium paratuberculosis*, *Mycobacterium kansasii*, *Mycobacterium tuberculosis*, *Mycobacterium avium* in patients with chronic inflammatory bowel disease. *Gut* 1990;**31**:529–35.
20. Rowbotham DS, Howdle PD, Trejdosiewicz LK. Peripheral cell-mediated immune response to mycobacterial antigens in inflammatory bowel disease. *Clin Exp Immunol* 1995;**102**:456–61.
21. MacDonald TT, Spencer J. Cell-mediated immune injury in the intestine. *Gastroenterol Clin North Am* 1992;**21**:367–86.
22. Zabana Y, Domenech E, San Roman AL, Beltran B, Cabriada JL, Saro C, et al. Tuberculous chemoprophylaxis requirements and safety in inflammatory bowel disease patients prior to anti-TNF therapy. *Inflamm Bowel Dis* 2008;**14**:1387–91.
23. The Robert Koch Institute. Bericht zur Epidemiologie der Tuberkulose in Deutschland für 2008. *Epidemiologisches Bulletin* 2009;**11**:83–5.
24. Qumseya BJ, Ananthakrishnan AN, Skaros S, Bonner M, Issa M, Zadornova Y, et al. QuantiFERON TB gold testing for tuberculosis screening in an inflammatory bowel disease cohort in the United States. *Inflamm Bowel Dis* 2011;**17**:77–83.
25. Papay P, Eser A, Winkler S, Frantal S, Primas C, Miehsler W, et al. Predictors of indeterminate IFN-gamma release assay in screening for latent TB in inflammatory bowel diseases. *Eur J Clin Invest* 2011;**41**:1071–6.
